# Supplementary material
Source: HighWire-hosted journal article supplement (https://erj.ersjournals.com/content/59/1/2101116)
Supplement: inline-supplementary-material-2 [file inline-supplementary-material-2.pdf]

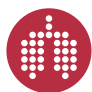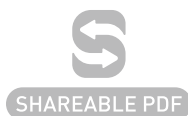

# Tuberculosis diagnostic accuracy of stool Xpert MTB/RIF and urine AlereLAM in vulnerable children

Patrick Orikiriza<sup>1,2,3</sup>, Julianna Smith<sup>1</sup>, Bob Ssekyanzi<sup>1</sup>, Dan Nyehangane<sup>1</sup>, Ivan Mugisha Taremwa<sup>1</sup>, Esther Turyashemerwa<sup>1</sup>, Onesmas Byamukama<sup>1,2</sup>, Tobias Tusabe<sup>2</sup>, Elisa Ardizzoni<sup>4,5</sup>, Ben J. Marais<sup>6</sup>, Eric Wobudeya<sup>7</sup>, Elizabeth Kemigisha<sup>1,2</sup>, Juliet Mwanga-Amumpaire<sup>1,2</sup>, Dora Nampijja<sup>2,8</sup> and Maryline Bonnet<sup>1,3</sup> 

<sup>1</sup>Epicentre Mbarara Research Centre, Mbarara, Uganda. <sup>2</sup>Mbarara University of Science and Technology, Mbarara, Uganda. <sup>3</sup>Université de Montpellier, IRD, INSERM, TransVIHMI, Montpellier, France. <sup>4</sup>Mycobacteriology Dept, Institute of Tropical Medicine, Antwerp, Belgium. <sup>5</sup>Médecins Sans Frontières, Paris, France. <sup>6</sup>The Children's Hospital at Westmead and WHO Collaborating Centre for Tuberculosis, University of Sydney, Sydney, Australia. <sup>7</sup>MUJHU Care Ltd, MUJHU Research Collaboration, Kampala, Uganda. <sup>8</sup>Pediatric Dept, Mbarara Regional Referral Hospital, Mbarara, Uganda.

Corresponding author: Maryline Bonnet ([maryline.bonnet@ird.fr](mailto:maryline.bonnet@ird.fr))

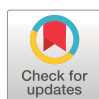

Shareable abstract (@ERSpublications)

**Modest sensitivity but high specificity and good feasibility support the use of stool Xpert MTB/RIF in young children at high risk of disseminated tuberculosis; however, urine AlereLAM showed poor specificity and has little applicability** <https://bit.ly/3oMLNHU>

**Cite this article as:** Orikiriza P, Smith J, Ssekyanzi B, et al. Tuberculosis diagnostic accuracy of stool Xpert MTB/RIF and urine AlereLAM in vulnerable children. *Eur Respir J* 2022; 59: 2101116 [DOI: 10.1183/13993003.01116-2021].

This single-page version can be shared freely online.

Copyright ©The authors 2022. For reproduction rights and permissions contact [permissions@ersnet.org](mailto:permissions@ersnet.org)

This article has supplementary material available from [erj.ersjournals.com](http://erj.ersjournals.com)

Received: 8 Feb 2021  
Accepted: 16 May 2021

## Abstract

**Background** Non-sputum-based diagnostic approaches are crucial in children at high risk of disseminated tuberculosis (TB) who cannot expectorate sputum. We evaluated the diagnostic accuracy of stool Xpert MTB/RIF and urine AlereLAM tests in this group of children.

**Methods** Hospitalised children with presumptive TB and either age <2 years, HIV-positive or with severe malnutrition were enrolled in a diagnostic cohort. At enrolment, we attempted to collect two urine, two stool and two respiratory samples. Urine and stool were tested with AlereLAM and Xpert MTB/RIF, respectively. Respiratory samples were tested with Xpert MTB/RIF and mycobacterial culture. Both a microbiological and a composite clinical reference standard were used.

**Results** The study analysed 219 children; median age 16.4 months, 72 (32.9%) HIV-positive and 184 (84.4%) severely malnourished. 12 (5.5%) and 58 (28.5%) children had confirmed and unconfirmed TB, respectively. Stool and urine were collected in 219 (100%) and 216 (98.6%) children, respectively. Against the microbiological reference standard, the sensitivity and specificity of stool Xpert MTB/RIF was 50.0% (6/12, 95% CI 21.1–78.9%) and 99.1% (198/200, 95% 96.4–99.9%), while that of urine AlereLAM was 50.0% (6/12, 95% 21.1–78.9%) and 74.6% (147/197, 95% 67.9–80.5%), respectively. Against the composite reference standard, sensitivity was reduced to 11.4% (8/70) for stool and 26.2% (17/68) for urine, with no major difference by age group (<2 and ≥2 years) or HIV status.

**Conclusions** The Xpert MTB/RIF assay has excellent specificity on stool, but sensitivity is suboptimal. Urine AlereLAM is compromised by poor sensitivity and specificity in children.
